# Supplementary material
Source: PubMed Central journal article supplement (PMC2997942)
Supplement: NIHMS237029-supplement-1_si_001.pdf [file NIHMS237029-supplement-1_si_001.pdf]

**Supplemental information for**

**Quantitative Structure Activity Relationship for Inhibition of Human Organic  
Cation/Carnitine Transporter (OCTN2)**

Lei Diao<sup>†</sup>, Sean Ekins<sup>†,‡,§</sup>, and James E. Polli<sup>\*,†</sup>

<sup>†</sup>Department of Pharmaceutical Sciences, School of Pharmacy, University of Maryland,  
20 Penn Street, Baltimore, Maryland 21201.

<sup>‡</sup> Collaborations in Chemistry, 601 Runnymede Avenue, Jenkintown, PA 19046.

<sup>§</sup> Department of Pharmacology, University of Medicine & Dentistry of New Jersey  
(UMDNJ)-Robert Wood Johnson Medical School, 675 Hoes Lane, Piscataway, NJ  
08854.

\*Author to whom correspondence should be addressed: Department of Pharmaceutical  
Sciences, School of Pharmacy, University of Maryland, HSF2, room 623, Baltimore, MD  
21201. Tel: 410-706-8292. Fax: 410-706-5017. E-mail: [jpolli@rx.umaryland.edu](mailto:jpolli@rx.umaryland.edu).

**Supplemental Table S1.** Summary table for the Bayesian model. This model was built using 22 training compounds and validated using a leave-one-out cross-validation. Each sample was left out one at a time; a model was built using the remaining 21 compounds, and that model was used to predict the left-out compound. From all 22 predictions, a ROC plot was generated. The area under the curve (**XV ROC AUC**) was calculated.

Best Split was calculated by identifying the split that minimized the sum of the percent misclassified for inhibitors and non-inhibitors, using the cross-validated score for each sample. Using that split, a contingency table is constructed (below), containing the number of true positives (**TP**), false negatives (**FN**), false positives (**FP**), and true negatives (**TN**).

| <b>XV ROC AUC</b> | <b>Best Split</b> | <b>TP/FN<br/>FP/TN</b> | <b>Number of OCTN2 inhibitors</b> |
|-------------------|-------------------|------------------------|-----------------------------------|
| 0.929             | -3.512            | 13/1<br>1/7            | 14                                |

**Supplemental Table S2.** Bayesian model enrichment results. This model was built using 22 training compounds and validated using a leave-one-out cross-validation. From all 22 predictions, an enrichment plot was generated. The percentage of true inhibitors captured at a particular percentage cutoff is tabulated below. For example, in the column labeled "1%", 7.1% of the OCTN2 inhibitors were found in the top 1% of the Bayesian model list, when sorted by Bayesian score. This table illustrates enrichment results. Almost 80% of OCTN2 inhibitors were listed in the top half of Bayesian score values. Percentages that are less than 100% are in **bold**. 14 (63.6%) of the 22 compounds were classed as inhibitors.

|                                                  | <b>Category %</b> | <b>1%</b>   | <b>5%</b>    | <b>10%</b>   | <b>25%</b>   | <b>50%</b>   | <b>75%</b>   | <b>90%</b> | <b>95%</b> | <b>99%</b> |
|--------------------------------------------------|-------------------|-------------|--------------|--------------|--------------|--------------|--------------|------------|------------|------------|
| Percent of the 22 compounds that were inhibitors | 63.6%             | <b>7.1%</b> | <b>14.3%</b> | <b>21.4%</b> | <b>42.9%</b> | <b>78.6%</b> | <b>92.9%</b> | 100%       | 100%       | 100%       |

**Supplemental Table S3.** Percentile results for Bayesian model. This table shows, for each candidate Bayesian model, the cutoff needed to capture a particular percentage of the good samples. For each cutoff, the estimated percentages of false positives and true negatives for non-good samples is shown. This table is designed to identify the cutoff value that best balances the capture of good samples, while limiting false positives. The rates shown in this table are estimates derived from the cross-validated data. The cutoff which lead to 10% or greater false positives are displayed in **bold** for ease of identification.

| <b>99%</b>      | <b>95%</b>      | <b>90%</b>      | <b>70%</b>      | <b>50%</b> | <b>30%</b> | <b>10%</b> | <b>5%</b> | <b>1%</b> |
|-----------------|-----------------|-----------------|-----------------|------------|------------|------------|-----------|-----------|
| -9.331          | -6.203          | -4.505          | -2.628          | -2.628     | 4.969      | 6.845      | 8.543     | 11.671    |
| <b>59%</b> /41% | <b>38%</b> /62% | <b>27%</b> /73% | <b>18%</b> /82% | 6%/94%     | 2%/98%     | 1%/99%     | 1%/99%    | 1%/99%    |

**Supplemental Table S4.** Predicted Bayesian scores for OCTN2 inhibitors and non-inhibitors.

| <b>Number of<br/>OCTN2<br/>inhibitors</b> | <b>Mean (<math>\pm</math>StdDev)<br/>predicted Bayesian<br/>score of OCTN2<br/>inhibitors</b> | <b>Number of<br/>OCTN2 non-<br/>inhibitors</b> | <b>Mean (<math>\pm</math>StdDev)<br/>predicted Bayesian<br/>score of OCTN2 non-<br/>inhibitors</b> |
|-------------------------------------------|-----------------------------------------------------------------------------------------------|------------------------------------------------|----------------------------------------------------------------------------------------------------|
| 14                                        | 1.17 ( $\pm$ 4.47)                                                                            | 8                                              | -8.14 ( $\pm$ 5.88)                                                                                |

**Supplemental Table S5.** Pharmacophore coordinates and inter feature distances (Å)

described in supplemental Figure S5.

| Pharmacophore feature | Hydrogen bond acceptor (HBA) | Hydrophobic | Hydrophobic | Positive Ionizable |
|-----------------------|------------------------------|-------------|-------------|--------------------|
| Weights               | 1.59896                      | 1.59896     | 1.59896     | 1.59896            |
| Tolerances            | 1.60 2.20                    | 1.60        | 1.60        | 1.60               |
| Coords : X            | 7.74 10.59                   | -3.00       | 1.12        | 5.75               |
| : Y                   | 4.76 5.06                    | 3.58        | 2.74        | 1.05               |
| : Z                   | 1.53 2.43                    | -0.44       | 4.88        | -0.56              |
|                       | o----->                      | o           | o           | o                  |
| HBA                   | o---> 3.0 Å                  |             |             |                    |
| Hydrophobic           | o 11.0 14.0                  |             |             |                    |
| Hydrophobic           | o 7.7 10.1                   | 6.8         |             |                    |
| Positive Ionizable    | o 4.7 7.0                    | 9.1         | 7.3         |                    |

**Supplemental Figure S1.** PCA of test set using data generated in our laboratory. 82.8% of the variance was explained by three principal components. Yellow spheres = test set; blue = training set.

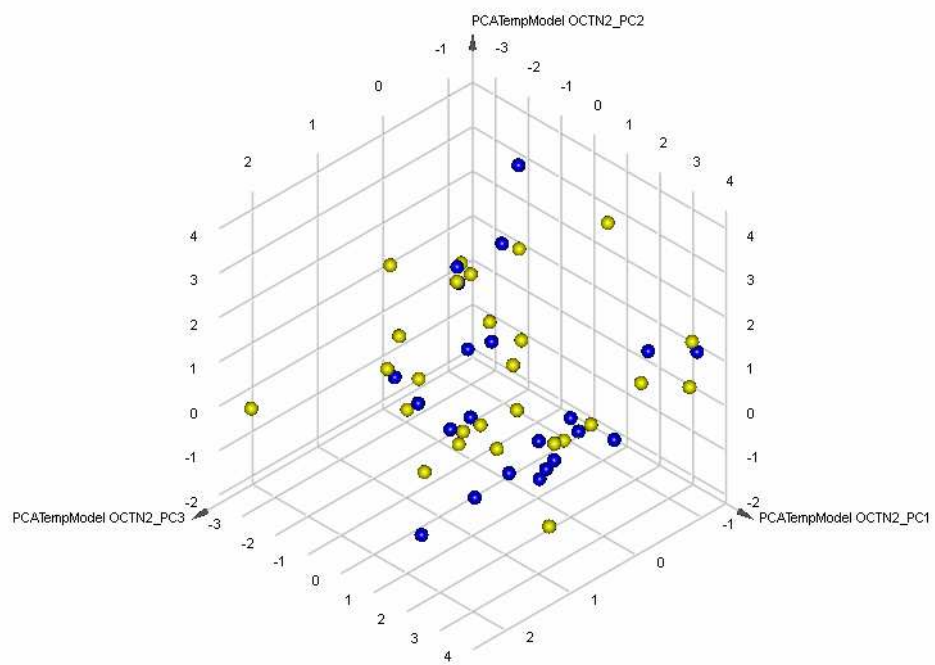

**Supplemental Figure S2.** PCA of literature test set. 83.6% of the variance explained by three principal components. Yellow spheres = test set; blue = training set.

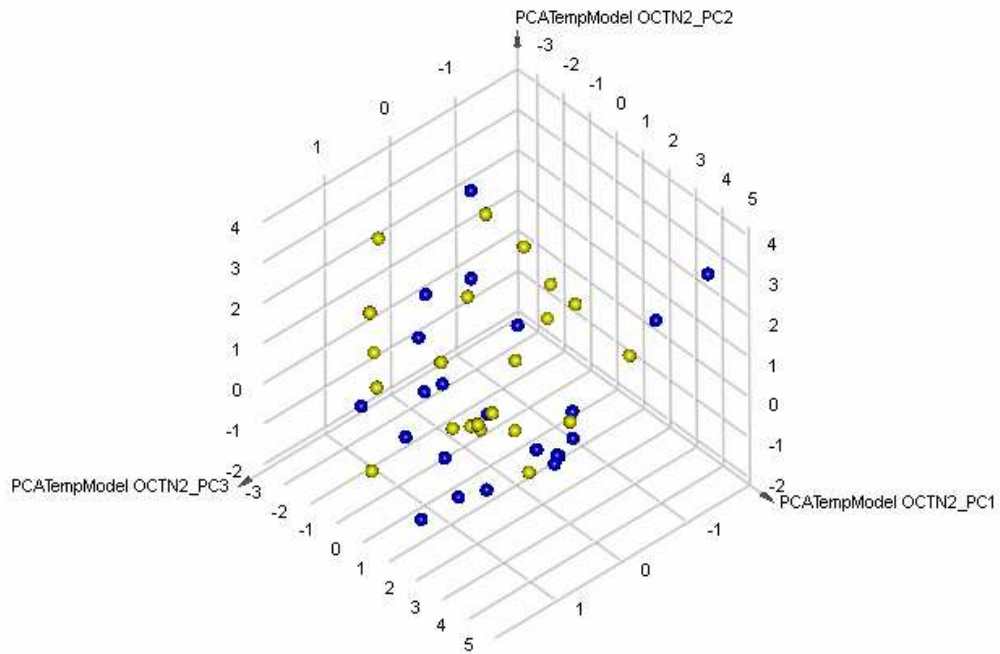



**Supplemental Figure S3.** A. Cetirizine uptake into OCTN2-MDCK cells in HBSS from 10 – 500  $\mu\text{M}$  in the presence and absence of 100  $\mu\text{M}$  L-carnitine. B. Cetirizine (100  $\mu\text{M}$ ) uptake into OCTN2-MDCK cells in HBSS in the absence and presence of ritonavir (1-50  $\mu\text{M}$ ).

**A**

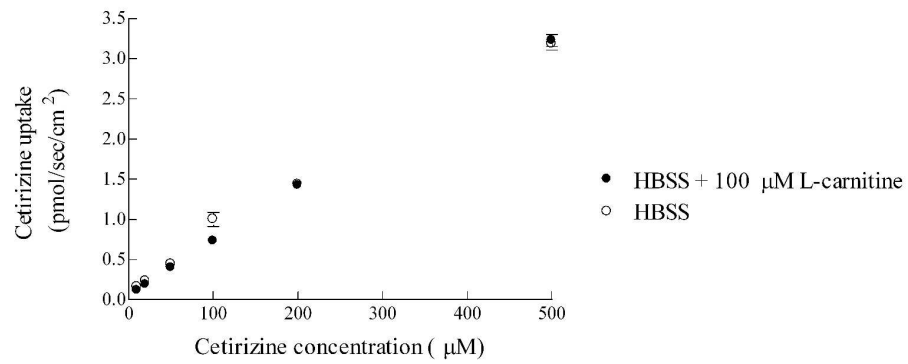

**B**

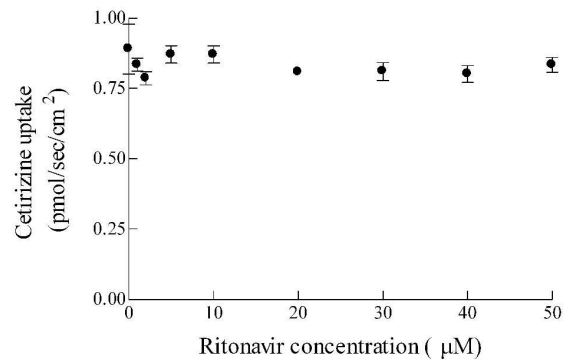

**Supplemental Figure S4.** Cephaloridine (0.5 mM) uptake into OCTN2-MDCK cells and MDCK cells in HBSS were determined. Furthermore, cephaloridine (0.5 mM) uptake into OCTN2-MDCK cells in HBSS in the presence of furosemide (0.5 - 2 mM) are plotted.

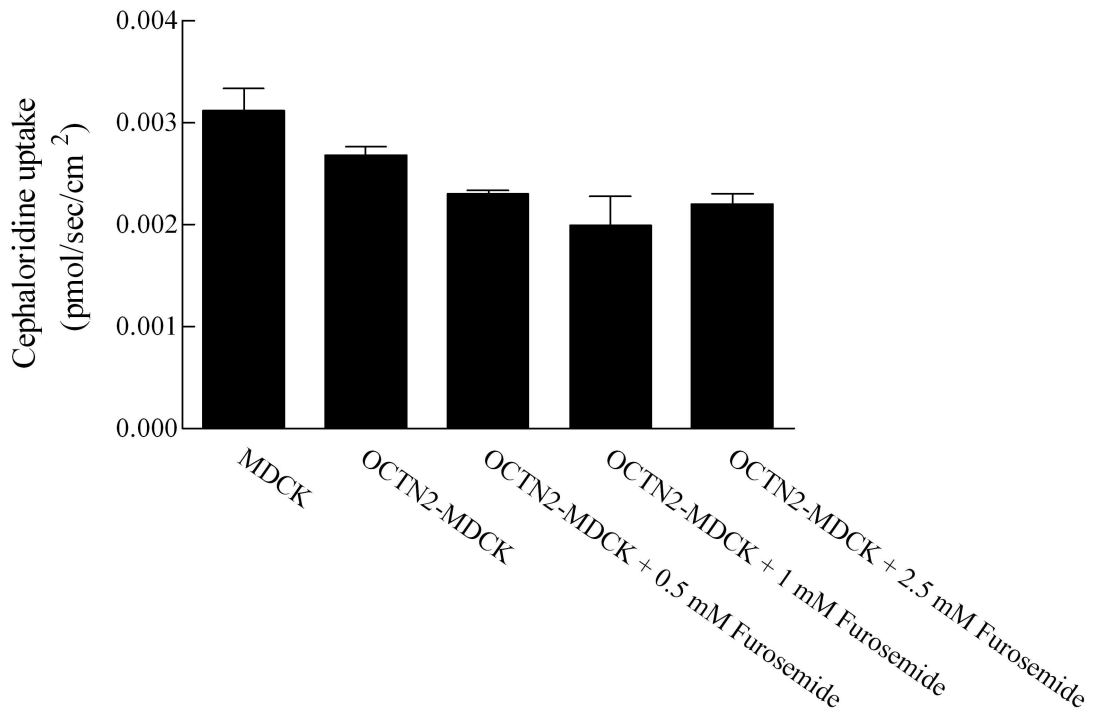

**Supplemental Figure S5.** OCTN2 pharmacophore inter-feature distances (Angstroms) and angles (Degrees).

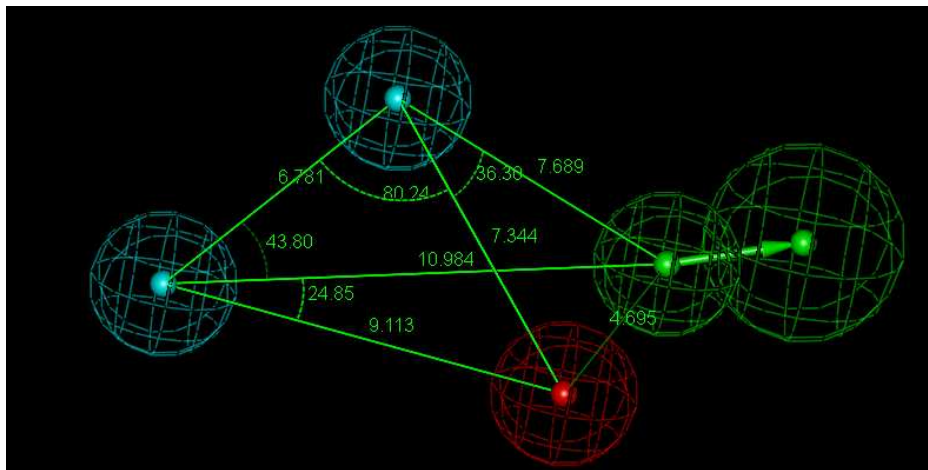

**Supplemental Table S6: List of references in manuscript Table 5.**

1. Van Wouwe J. P. Carnitine deficiency during valproic acid treatment. *Int. J. Vitam. Nutr. Res.* 1995, 65, 211-4.
2. <http://www.drugs.com/mmx/cefazolin.html>
3. Ganapathy, M. E.; Huang, W.; Rajan, D. P.; Carter, A. L.; Sugawara, M.; Iseki, K.; Leibach, F. H.; Ganapathy, V. Beta-lactam antibiotics as substrates for OCTN2, an Organic Cation/Carnitine Transporter. *J. Biol. Chem.* 2000, 275, 1699-1707.
4. [http://www.patientsville.com/medication/cephalexin\\_side\\_effects.htm](http://www.patientsville.com/medication/cephalexin_side_effects.htm)
5. Cheng, C. H.; Miller, C.; Lowe, C.; Pearson, V. E. Rhabdomyolysis due to probable interaction between simvastatin and ritonavir. *Am. J. Health. Syst. Pharm.* 2002, 59, 728-30.
6. Pochini, L.; Scalise, M.; Indiveri, C. Inactivation by omeprazole of the carnitine transporter (OCTN2) reconstituted in liposomes. *Chem. Biol. Interact.* 2009, 179, 394-401.
7. Richards, S.; Umbreit, J. N.; Fanucchi, M. P.; Giblin, J.; Khuri, F. Selective serotonin reuptake inhibitor-induced rhabdomyolysis associated with irinotecan. *South. Med. J.* 2003, 96, 1031-3.
8. Baker, S. K.; Lipson, D. M. Vincristine-induced peripheral neuropathy in a neonate with congenital acute lymphoblastic leukemia. *J. Pediatr. Hematol. Oncol.* 2010, 32, e114-7.
9. <http://rhabdomyolysis.myadversereaction.com/>
10. Huynh, T.; Cordato, D.; Yang, F.; Choy, T.; Johnstone, K.; Bagnall, F.; Hitchens, N.; Dunn, R. HMG CoA reductase-inhibitor-related myopathy and the influence of drug interactions. *Intern. Med. J.* 2002, 32, 486-90.

11. Kuntzer, T.; Reichmann, H.; Bogousslavsky, J.; Regli, F. Emetine-induced myopathy and carnitine deficiency. *J Neurol.* 1990, 237, 495-6.
12. Schreiber, D. H.; Anderson, T. R. Statin-induced rhabdomyolysis. *J. Emerg. Med.* 2006, 31, 177-80.
13. Taibjee, S. M.; Ramani, P.; Brown, R.; Moss, C. Lethal cardiomyopathy in epidermolysis bullosa associated with amitriptyline. *Arch. Dis. Child.* 2005, 90, 871-2.
14. Ursini, F.; Succurro, E.; Grembiale, A.; Arturi, F. Acute rhabdomyolysis during treatment with amisulpride and metformin. *Eur. J. Clin. Pharmacol.* 2010, 66, 321-2.
15. Weffald, L. A.; Flach, L. A. Myopathy associated with atorvastatin-ezetimibe combination therapy. *Pharmacotherapy.* 2007, 27, 309-11.
16. Fontiveros, E. S.; Cumming, W. J.; Hudgson, P. Procainamide-induced myositis. *J. Neurol. Sci.* 1980, 45, 143-7.
17. Cheng, C.H.; Miller, C.; Lowe, C.; Pearson, V. E. Rhabdomyolysis due to probable interaction between simvastatin and ritonavir. *Am. J. Health. Syst. Pharm.* 2002, 59, 728-30.
18. Matake, K.; Tajima, T.; Yoshimitsu, K.; Irie, H.; Aibe, H.; Sugitani, A.; Honda, H. Rhabdomyolysis developing after transcatheter arterial chemoembolization for hepatocellular carcinoma. *Cardiovasc. Intervent. Radiol.* 2009, 32, 1284-7.
19. Al-Majed, A. A.; Sayed-Ahmed, M. M.; Al-Yahya, A. A.; Aleisa, A. M.; Al-Rejaie, S. S.; Al-Shabanah, O. A. Propionyl-L-carnitine prevents the progression of cisplatin-induced cardiomyopathy in a carnitine-depleted rat model. *Pharmacol. Res.* 2006, 53, 278-86.
20. Peng, Y.; Yang, J.; Wang, Z.; Wang, J.; Liu, Y.; Luo, Z.; Wen, A. Determination of mildronate by LC-MS/MS and its application to a pharmacokinetic study in healthy

- Chinese volunteers. *J. Chromatogr. B. Analyt. Technol. Biomed. Life. Sci.* 2010, 878, 551-6.
21. Chen, L. C.; Chou, M. H.; Lin, M. F.; Yang, L. L. Lack of pharmacokinetic interaction between valproic acid and a traditional Chinese medicine, Paeoniae Radix, in healthy volunteers. *J. Clin. Pharm. Ther.* 2000, 25, 453-9.
22. <http://www.antimicrobe.org/drugpopup/Cefazolin.pdf>
23. Garrelts, J. C.; Wagner, D. J. The pharmacokinetics, safety, and tolerance of cefepime administered as an intravenous bolus or as a rapid infusion. *Ann. Pharmacother.* 1999, 33, 1258-61.
24. Paradelis, A. G.; Stathopoulos, G.; Trianthaphyllidis, C.; Logaras, G. Pharmacokinetics of five cephalosporins in healthy male volunteers. *Arzneimittelforschung.* 1977, 27, 2167-70.
25. Davis, J. L.; Salmon, J. H.; Papich, M. G. Pharmacokinetics and tissue fluid distribution of cephalexin in the horse after oral and i.v. administration. *J. Vet. Pharmacol. Ther.* 2005, 28, 425-31.
26. <http://www.rxlist.com/neurontin-drug.htm>
27. Ng, J.; Klein, C. E.; Causemaker, S. J.; Xiong, J.; Chiu, Y. L.; Wikstrom, K.; Doan, T. T.; Podsadecki, T. J.; Bernstein, B. A Comparison of the Single Dose Bioavailability of a Ritonavir Tablet Formulation Relative to the Ritonavir Soft Gelatin Capsule in Healthy Adult Subjects. XVII International AIDS Conference, August 3-8 2008, Mexico City
28. Joti, J. J.; Nahar, K.; Hasan, A.; Azad, M. A.; Ullah, M. A.; Islam, S. M.; Hasnat, A. Bioequivalence and pharmacokinetic study of two different omeprazole capsule formulations in healthy Bangladeshi volunteers. *Arzneimittelforschung.* 2009, 59, 171-5.

29. Qiu, F.; Zhao, L. M.; Sun, Y. X.; He X. J.; Zhu, X. Pharmacokinetics of cefoselis injection after a single dose in Chinese healthy volunteers. *The Chinese J. Cli. Pharmacol.* 2009, 25.
30. [http://www.pfizer.com/files/products/uspi\\_camptosar.pdf](http://www.pfizer.com/files/products/uspi_camptosar.pdf)
31. Xu, F. G.; Liu, Y.; Zhang, Z. J.; Tian, Y.; Chen, Y. Pharmacokinetics and bioequivalence study of two cetirizine hydrochloride formulations in healthy Chinese male volunteers. *Arzneimittelforschung.* 2009, 59, 440-4.
32. Kosoglou, T.; Salfi, M.; Lim, J. M.; Batra, V. K.; Cayen, M. N.; Affrime, M. B. Evaluation of the pharmacokinetics and electrocardiographic pharmacodynamics of loratadine with concomitant administration of ketoconazole or cimetidine. *Br. J. Clin. Pharmacol.* 2000, 50, 581-9.
33. Krishna, R.; Webb, M. S.; St Onge, G.; Mayer, L. D. Liposomal and nonliposomal drug pharmacokinetics after administration of liposome-encapsulated vincristine and their contribution to drug tissue distribution properties. *J. Pharmacol. Exp. Ther.* 2001, 298, 1206-12.
34. Al-Said, M. S.; Al-Khamis, K. I.; Niazy, E. M.; El-Sayed, Y. M.; Al-Rashood, K. A.; Al-Bella, S.; Al-Yamani, M. A.; Al-Najjar, T. A.; Alam, S. M.; Dham, R.; Zaman Qumaruzaman, Q. Bioequivalence evaluation of two brands of cefuroxime 500 mg tablets (Cefuzime and Zinnat) in healthy human volunteers. *Biopharm. Drug Dispos.* 2000, 21, 205-10.
35. Lubasch, A.; Keller, I.; Borner, K.; Koeppe, P.; Lode, H. Comparative pharmacokinetics of ciprofloxacin, gatifloxacin, grepafloxacin, levofloxacin, trovafloxacin, and

- moxifloxacin after single oral administration in healthy volunteers. *Antimicrob. Agents Chemother.* 2000, 44, 2600-3.
36. Sun, J.; Zhang, T.; Qiu, F.; Liu, Y.; Tang, J.; Huang, H.; He, Z. Impact of pharmaceutical dosage forms on the pharmacokinetics of roxithromycin in healthy human volunteers. *J. Antimicrob. Chemother.* 2005, 55, 796-9.
37. Chen, X.; Zhong, D.; Blume, H. Stereoselective pharmacokinetics of propafenone and its major metabolites in healthy Chinese volunteers. *Eur. J. Pharm. Sci.* 2000, 10, 11-6.
38. Abdel-Rahman, S. M.; Johnson, F. K.; Connor, J. D.; Staiano, A.; Dupont, C.; Tolia, V.; Winter, H.; Gauthier-Dubois, G.; Kearns, G. L. Developmental pharmacokinetics and pharmacodynamics of nizatidine. *J. Pediatr. Gastroenterol. Nutr.* 2004, 38, 442-51.
39. Bonnetterre, J.; Chevalier, B.; Focan, C.; Mauriac, L.; Piccart, M. Phase I and pharmacokinetic study of weekly oral therapy with vinorelbine in patients with advanced breast cancer (ABC). *Ann. Oncol.* 2001, 12, 1683-91.
40. Xu, F. G.; Zhang, Z. J.; Dong, H. J.; Tian, Y.; Liu, Y.; Chen, Y. Bioequivalence assessment of two formulations of spironolactone in Chinese healthy male volunteers. *Arzneimittelforschung.* 2008, 58, 117-21.
41. Scharman, E. J.; Hutzler, J. M.; Rosencrance, J. G.; Tracy, T. S. Single dose pharmacokinetics of syrup of ipecac. *Ther. Drug. Monit.* 2000, 22, 566-73.
42. McKenney, J. M.; Swearingen, D.; Di Spirito, M.; Doyle, R.; Pantaleon, C.; Kling, D.; Shalwitz, R. A. Study of the pharmacokinetic interaction between simvastatin and prescription omega-3-acid ethyl esters. *J. Clin. Pharmacol.* 2006, 46, 785-91.



43. Hedner, T.; Hedner, J.; Gelin-Friberg, A.; Huang, M. L.; Van de Poel, S.; Woestenborghs, R.; Van Peer, A.; Heykants, J. Comparative bioavailability of a cisapride suppository and tablet formulation in healthy volunteers. *Eur. J. Clin. Pharmacol.* 1990, 38, 629-31.
44. Shu, Y.; Brown, C.; Castro, R. A.; Shi, R. J.; Lin, E. T.; Owen, R. P.; Sheardown, S. A.; Yue, L.; Burchard, E. G.; Brett, C. M.; Giacomini, K. M. Effect of genetic variation in the organic cation transporter 1, OCT1, on metformin pharmacokinetics. *Clin. Pharmacol. Ther.* 2008, 83, 273-80.
45. Dhunnoo, Yuvrajsing. Pharmacokinetic study of frusemide in healthy and cirrhotic Indian subject. *Internet Journal of Medical Update* 2008, 3, 2-10.
46. <http://www.pmda.go.jp/english/service/pdf/Zetia.pdf>
47. Dart, C. R. Medical Toxicology (3<sup>rd</sup> Edition). Lippincott Williams & Wilkins, 2003
48. <http://www.rxlist.com/zantac-drug.htm>
49. Liebmann, B.; Henke, D.; Spahn-Langguth, H.; Mutschler, E. Determination of the quaternary compound ciclotropium in human biological material after hydrolysis and derivatization with the fluorophor flunoxapofen chloride. *J. Chromatogr.* 1991, 572, 181-93.
50. Migdalof, B. H.; Grindel, J. M.; Heykants, J. J.; Janssen, P. A. Penfluridol: a neuroleptic drug designed for long duration of action. *Drug. Metab. Rev.* 1979, 9, 281-99.
51. Cutler, N. R.; Sedman, A. J.; Prior, P.; Underwood, B. A.; Selen, A.; Balogh, L.; Kinkel, A. W.; Gracon, S. I.; Gamzu, E. R. Steady-state pharmacokinetics of tacrine in patients with Alzheimer's disease. *Psychopharmacol. Bull.* 1990, 26, 231-4.

52. Cho, H. Y.; Lee, Y. B. Pharmacokinetics and bioequivalence evaluation of risperidone in healthy male subjects with different CYP2D6 genotypes. *Arch. Pharm. Res.* 2006, 29, 525-33.
53. Lin, J. H.; Chremos, A. N.; Kanovsky, S. M.; Schwartz, S.; Yeh, K. C.; Kann, J. Effects of antacids and food on absorption of famotidine. *Br. J. Clin. Pharmacol.* 1987, 24, 551-3.
54. Fumagalli, L.; Zucchetti, M.; Parisi, I.; Viganò, M. G.; Zecca, B.; Careddu, A.; D'Incalci, M.; Lazzarin, A. The pharmacokinetics of liposomal encapsulated daunorubicin are not modified by HAART in patients with HIV-associated Kaposi's sarcoma. *Cancer Chemother. Pharmacol.* 2000, 45, 495-501.
55. <http://www.drugs.com/pro/reserpine.html>
56. Tomita, M.; Kurata, H.; Aoki, Y.; Tanaka, K.; Kazama, J. J. Pharmacokinetics of paclitaxel and cisplatin in a hemodialysis patient with recurrent ovarian cancer. *Anticancer. Drugs.* 2001, 12, 485-7.
57. Burz, C.; Berindan-Neagoe, I. B.; Balacescu, O.; Tanaselia, C.; Ursu, M.; Gog, A.; Vlase, L.; Chintoanu, M.; Balacescu, L.; Leucuta, S. E.; Irimie, A.; Cristea, V. Clinical and pharmacokinetics study of oxaliplatin in colon cancer patients. *J. Gastrointestin. Liver. Dis.* 2009, 18, 39-43.
58. Lilja, J. J.; Raaska, K.; Neuvonen, P. J. Effects of grapefruit juice on the pharmacokinetics of acebutolol. *Br. J. Clin. Pharmacol.* 2005, 60, 659-63.
59. Almeida, A. A.; Campos, D. R.; Bernasconi, G.; Calafatti, S.; Barros, F. A.; Eberlin, M. N.; Meurer, E. C.; Paris, E. G.; Pedrazzoli, J. Determination of memantine in human plasma by liquid chromatography-electrospray tandem mass spectrometry: application to

- a bioequivalence study. *J. Chromatogr. B. Analyt. Technol. Biomed. Life. Sci.* 2007, 848, 311-6.
60. Creasey, W. A.; Funke, P. T.; McKinstry, D. N.; Sugerman, A. A. Pharmacokinetics of captopril in elderly healthy male volunteers. *J. Clin. Pharmacol.* 1986, 26, 264-8.
61. Baris, N.; Kalkan, S.; Güneri, S.; Bozdemir, V.; Guven, H. Influence of carvedilol on serum digoxin levels in heart failure: is there any gender difference? *Eur. J. Clin. Pharmacol.* 2006, 62, 535-8.
62. Eddington, N. D.; Rekhi, G. S.; Lesko, L. J.; Augsburger, L. L. Scale-up effects on dissolution and bioavailability of propranolol hydrochloride and metoprolol tartrate tablet formulations. *AAPS. PharmSciTech.* 2000, 1, E14.
63. Toothaker, R. D.; Barker, S. H.; Gillen, M. V.; Helsinger, S. A.; Kindberg, C. G.; Hunt, T. L.; Powell, J. H. Absence of pharmacokinetic interaction between orally co-administered naproxen sodium and diphenhydramine hydrochloride. *Biopharm. Drug Dispos.* 2000, 21, 229-33.
64. [http://www.dentsplypharma.com/pdf/pi\\_oraqix.pdf](http://www.dentsplypharma.com/pdf/pi_oraqix.pdf)
65. <http://www.drugs.com/ppa/probenecid.html>
